# Supplementary material for: What do we know about bifunctional cage-like T8 silsesquioxanes? Theory versus lab routine
Source: Royal Society of Chemistry journal article supplement (doi:10.1039/d3dt02638h), 2023-01-01
Supplement: d3dt02638h1.pdf [file d3dt02638h1.pdf]

*Electronic Supporting Information (ESI)*

**What do we know about bifunctional cage-like T<sub>8</sub> silsesquioxanes?  
Theory versus lab routine**

Kamila Fuchs<sup>a</sup>, Edyta Nizioł<sup>a</sup>, Jolanta Ejfler<sup>a</sup>, Wiktor Zierkiewicz<sup>b</sup>, Anna Władyczyn<sup>a</sup>  
and Łukasz John<sup>a,\*</sup>

<sup>a</sup> Faculty of Chemistry, University of Wrocław, 14 F. Joliot-Curie, 50-383 Wrocław, Poland

<sup>b</sup> Faculty of Chemistry, Wrocław University of Science and Technology, 27 Wybrzeże  
Wyspiańskiego, 50-370 Wrocław, Poland

\*Corresponding author: Łukasz John, e-mail: lukasz.john@uwr.edu.pl

**Table of contents**

**1. Characterization of phenylhepta(isobutyl)-POSS T<sub>8</sub>(i-Bu)<sub>7</sub>(Ph) (1)**

|                   |                                                                                      |   |
|-------------------|--------------------------------------------------------------------------------------|---|
| <b>Figure S1.</b> | <sup>1</sup> H NMR (500 MHz, CDCl <sub>3</sub> , 300 K) spectrum of <b>1</b> .....   | 3 |
| <b>Figure S2.</b> | <sup>13</sup> C NMR (500 MHz, CDCl <sub>3</sub> , 300 K) spectrum of <b>1</b> .....  | 3 |
| <b>Figure S3.</b> | <sup>29</sup> Si NMR (600 MHz, CDCl <sub>3</sub> , 300 K) spectrum of <b>1</b> ..... | 4 |
| <b>Figure S4.</b> | FT-IR spectrum (KBr pellet) of <b>1</b> .....                                        | 4 |
| <b>Figure S5.</b> | MALDI-MS ([M + Na] <sup>+</sup> ) of <b>1</b> .....                                  | 5 |

**2. Characterization of partially condensed trisilanol phenylhexa(isobutyl)-POSS  
T<sub>7</sub>(i-Bu)<sub>6</sub>(Ph)(OH)<sub>3</sub> (2)**

|                    |                                                                                      |   |
|--------------------|--------------------------------------------------------------------------------------|---|
| <b>Figure S6.</b>  | <sup>1</sup> H NMR (600 MHz, CDCl <sub>3</sub> , 300 K) spectrum of <b>2</b> .....   | 5 |
| <b>Figure S7.</b>  | <sup>13</sup> C NMR (500 MHz, CDCl <sub>3</sub> , 300 K) spectrum of <b>2</b> .....  | 6 |
| <b>Figure S8.</b>  | <sup>29</sup> Si NMR (600 MHz, CDCl <sub>3</sub> , 300 K) spectrum of <b>2</b> ..... | 6 |
| <b>Figure S9.</b>  | FT-IR spectrum (KBr pellet) of <b>2</b> .....                                        | 7 |
| <b>Figure S10.</b> | MALDI-MS ([M + Na] <sup>+</sup> ) of <b>2</b> .....                                  | 7 |
| <b>Figure S11.</b> | DOSY NMR of <b>2</b> .....                                                           | 8 |

**3. Diphenylhexa(isobutyl)-POSS  $T_8(i-Bu)_6(Ph)_2$  synthesis attempt (instead – characterization of trisilanol hepta(isobutyl)-POSS  $T_7(i-Bu)_7(OH)_3$  (3))**

|                    |                                                                      |    |
|--------------------|----------------------------------------------------------------------|----|
| <b>Figure S12.</b> | $^1H$ NMR (500 MHz, $CDCl_3$ , 300 K) spectrum of <b>3</b> .....     | 8  |
| <b>Figure S13.</b> | $^{13}C$ NMR (500 MHz, $CDCl_3$ , 300 K) spectrum of <b>3</b> .....  | 9  |
| <b>Figure S14.</b> | $^{29}Si$ NMR (600 MHz, $CDCl_3$ , 300 K) spectrum of <b>3</b> ..... | 9  |
| <b>Figure S15.</b> | MALDI-MS ( $[M + Na]^+$ ) of <b>3</b> .....                          | 10 |
| <b>Figure S16.</b> | DOSY NMR of <b>3</b> .....                                           | 10 |
| <b>Figure S17.</b> | Molecular structure of <b>3</b> .....                                | 11 |

**4. Quantum calculations**

|                    |                                                                                                     |    |
|--------------------|-----------------------------------------------------------------------------------------------------|----|
| <b>Figure S18.</b> | Relative Gibbs free energies (kcal/mol) for DFT optimized POSS structures .....                     | 12 |
| <b>Table S1.</b>   | The calculated HOMO-LUMO energy gaps and quantum chemical properties of POSS complexes .....        | 15 |
| <b>Figure S19.</b> | The calculated HOMO and LUMO energy levels and HOMO-LUMO energy gaps of optimized POSS models ..... | 17 |
| <b>Table S2.</b>   | Energies of calculated POSS models .....                                                            | 19 |

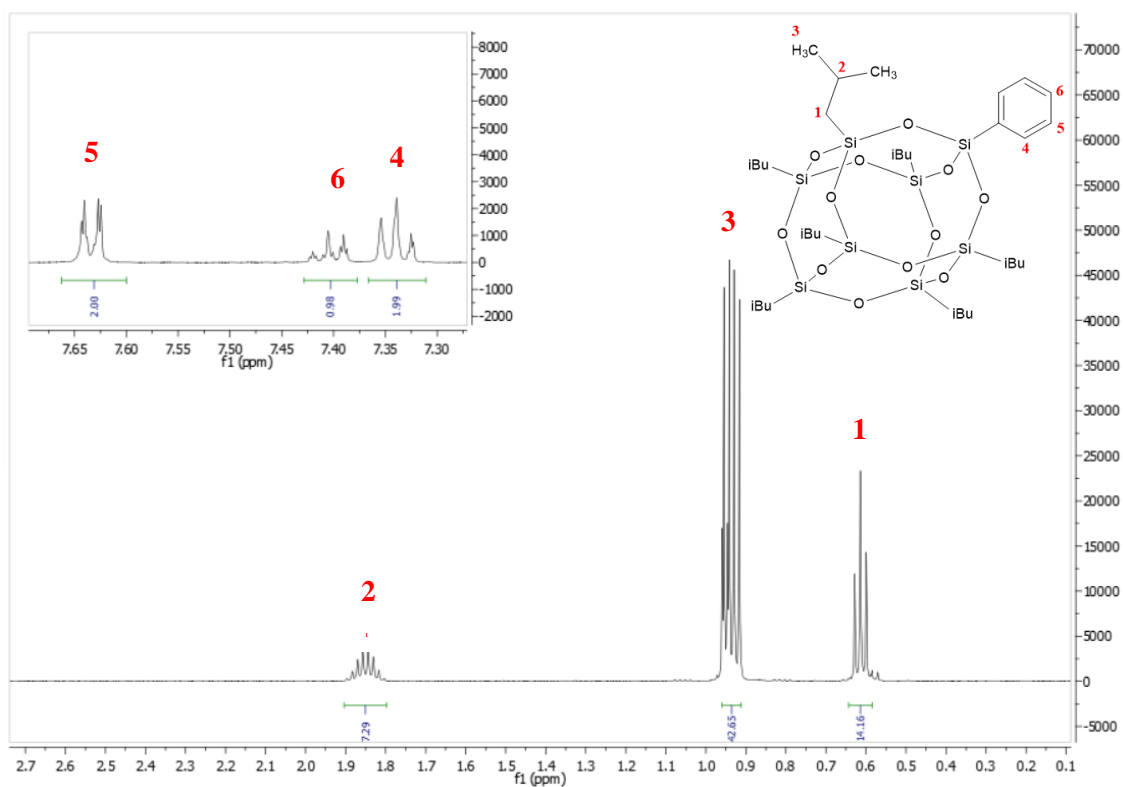

**Figure S1.**  $^1\text{H}$  NMR (500 MHz,  $\text{CDCl}_3$ , 300 K) spectrum of **1**.

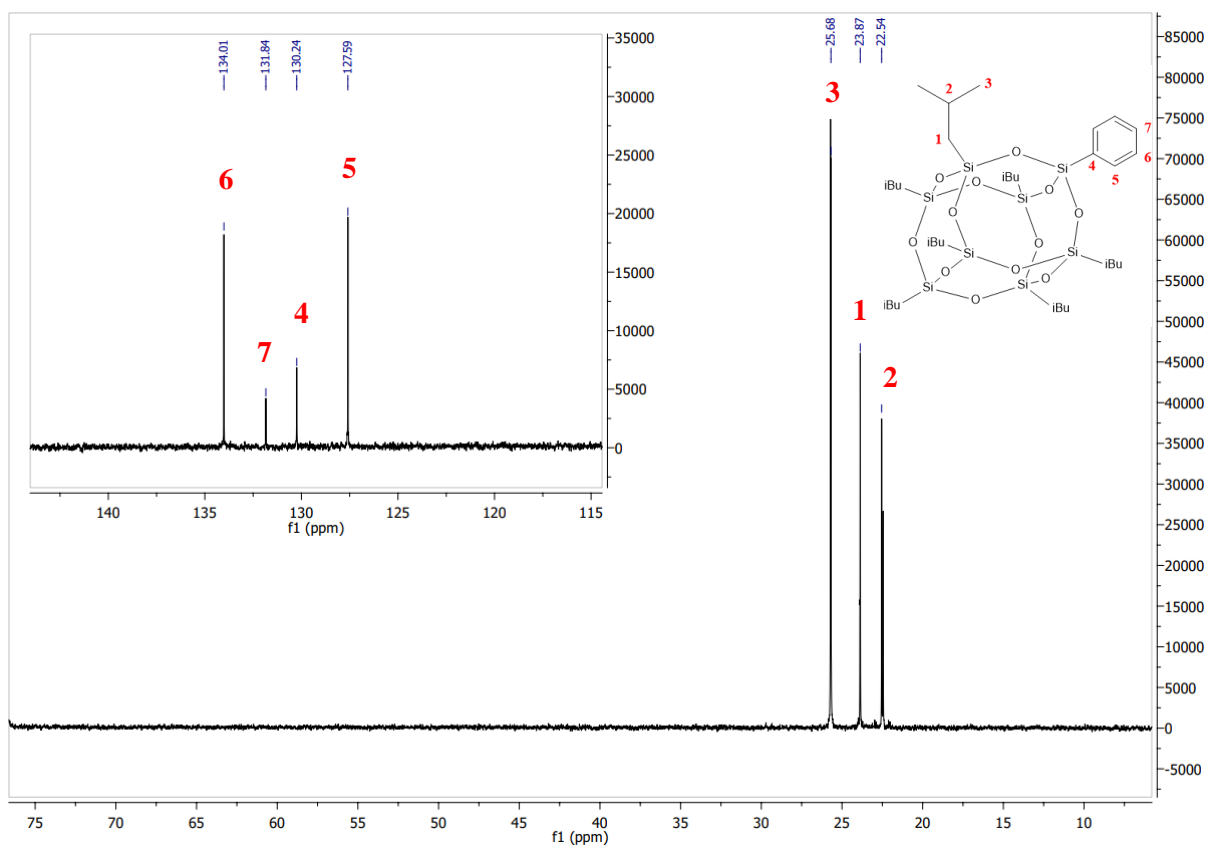

**Figure S2.**  $^{13}\text{C}$  NMR (500 MHz,  $\text{CDCl}_3$ , 300 K) spectrum of **1**.

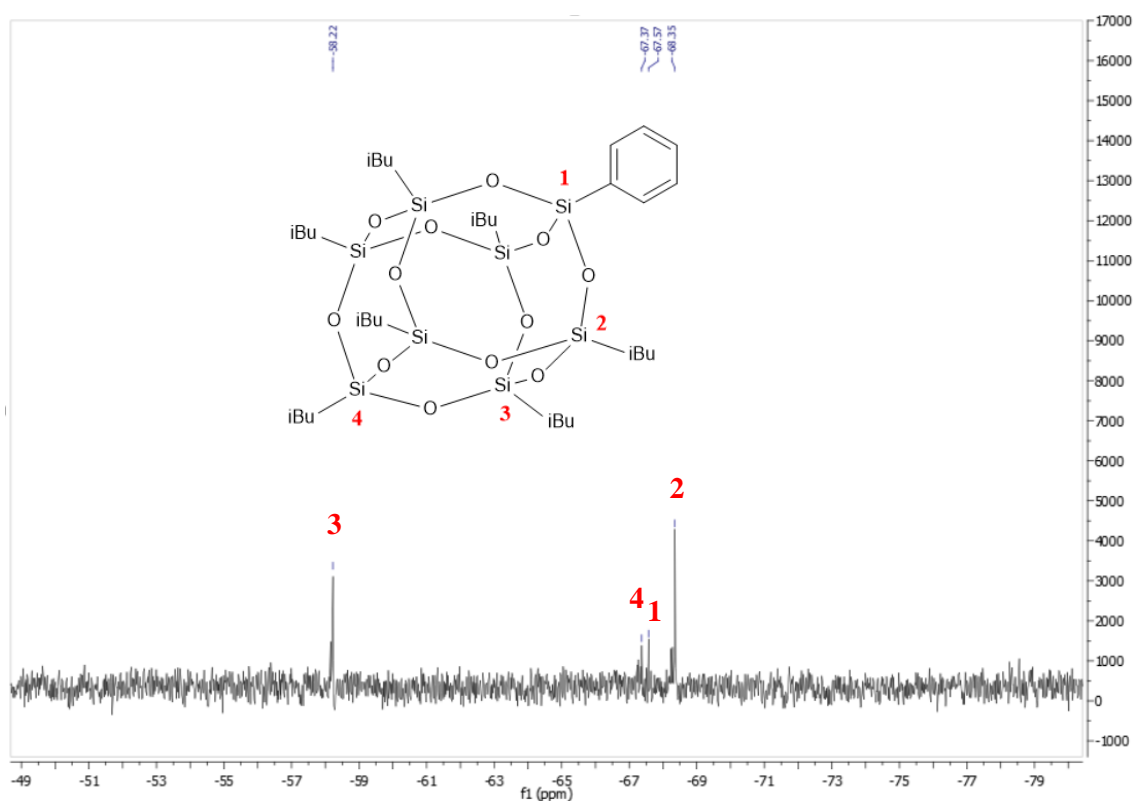

**Figure S3.**  $^{29}\text{Si}$  NMR (600 MHz,  $\text{CDCl}_3$ , 300 K) spectrum of **1**.

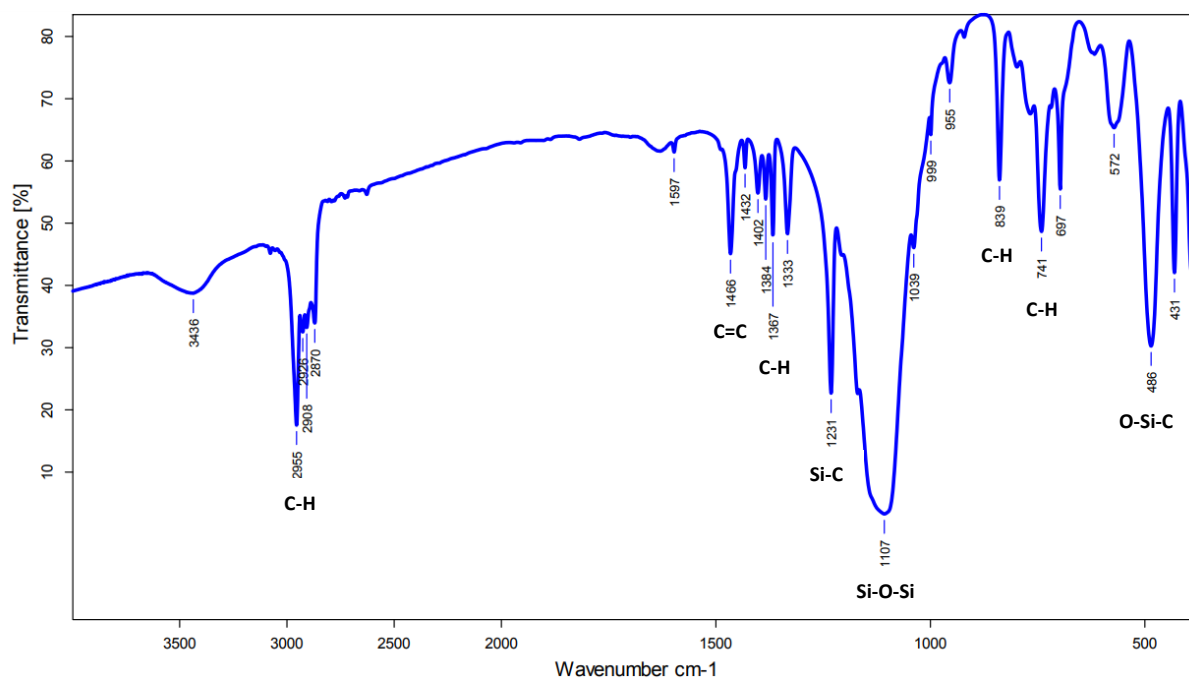

**Figure S4.** FT-IR spectrum (KBr pellet) of **1**.

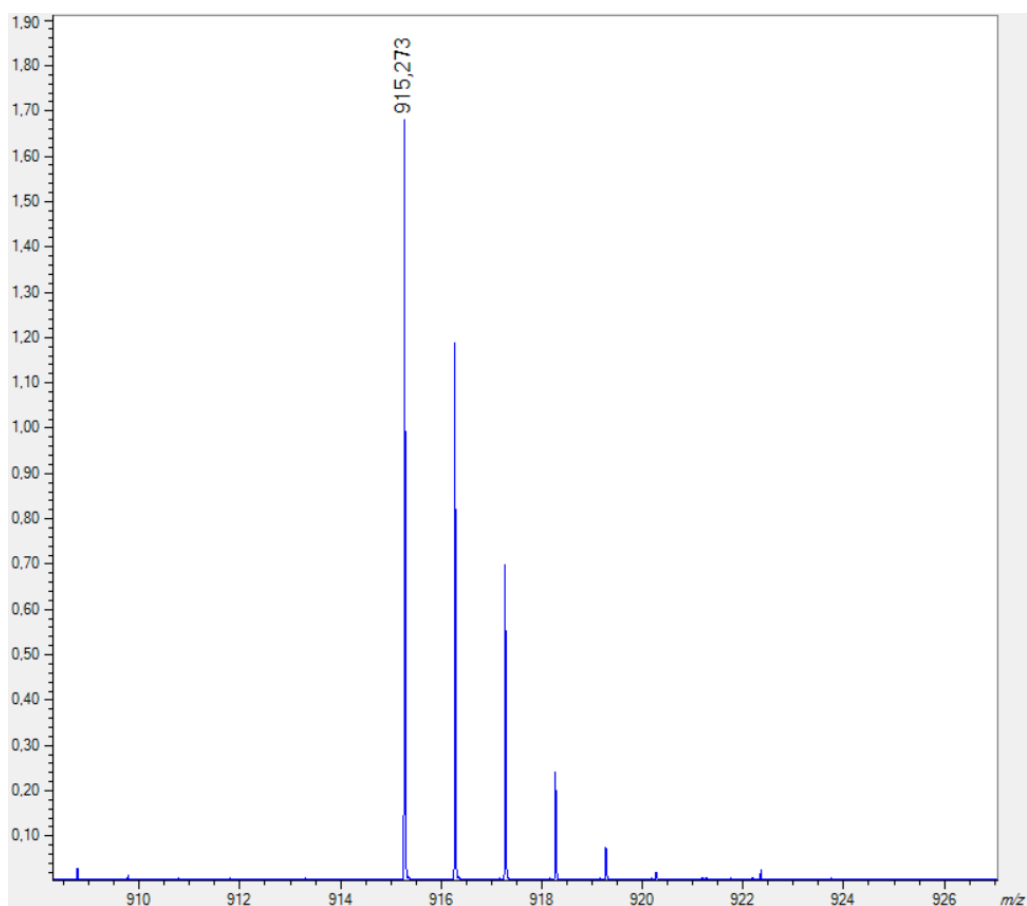

Figure S5. MALDI-MS of 1.

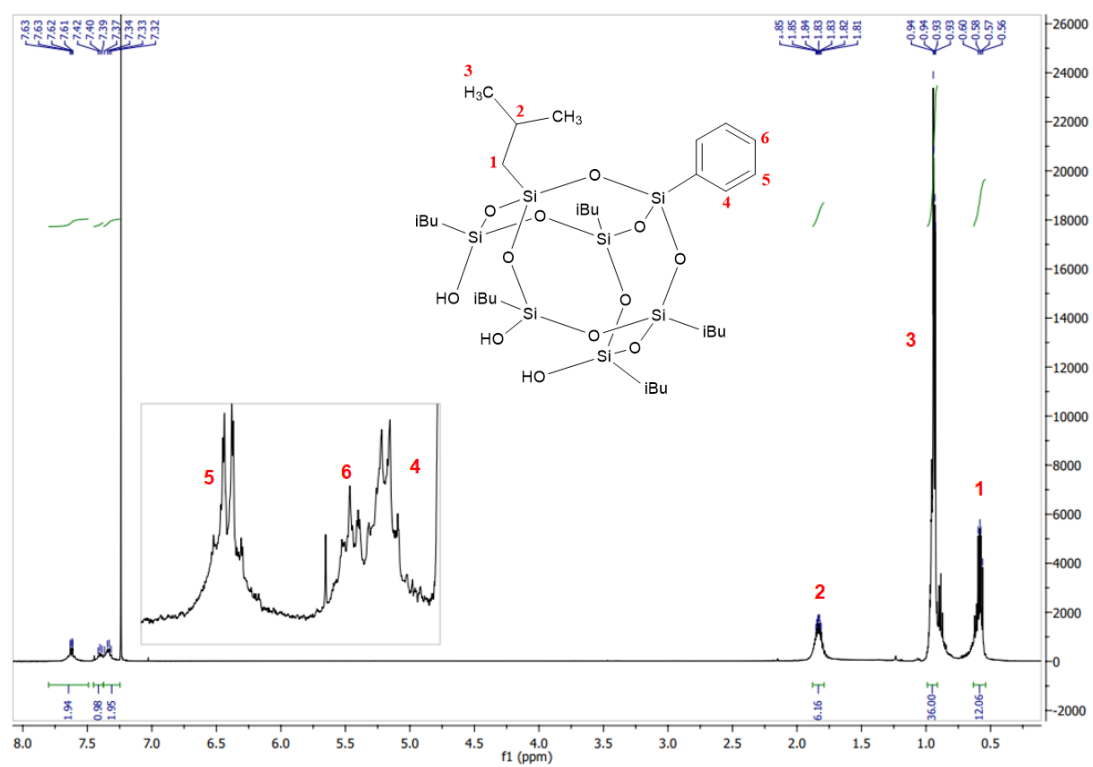

Figure S6.  $^1\text{H}$  NMR (600 MHz,  $\text{CDCl}_3$ , 300 K) spectrum of 2.

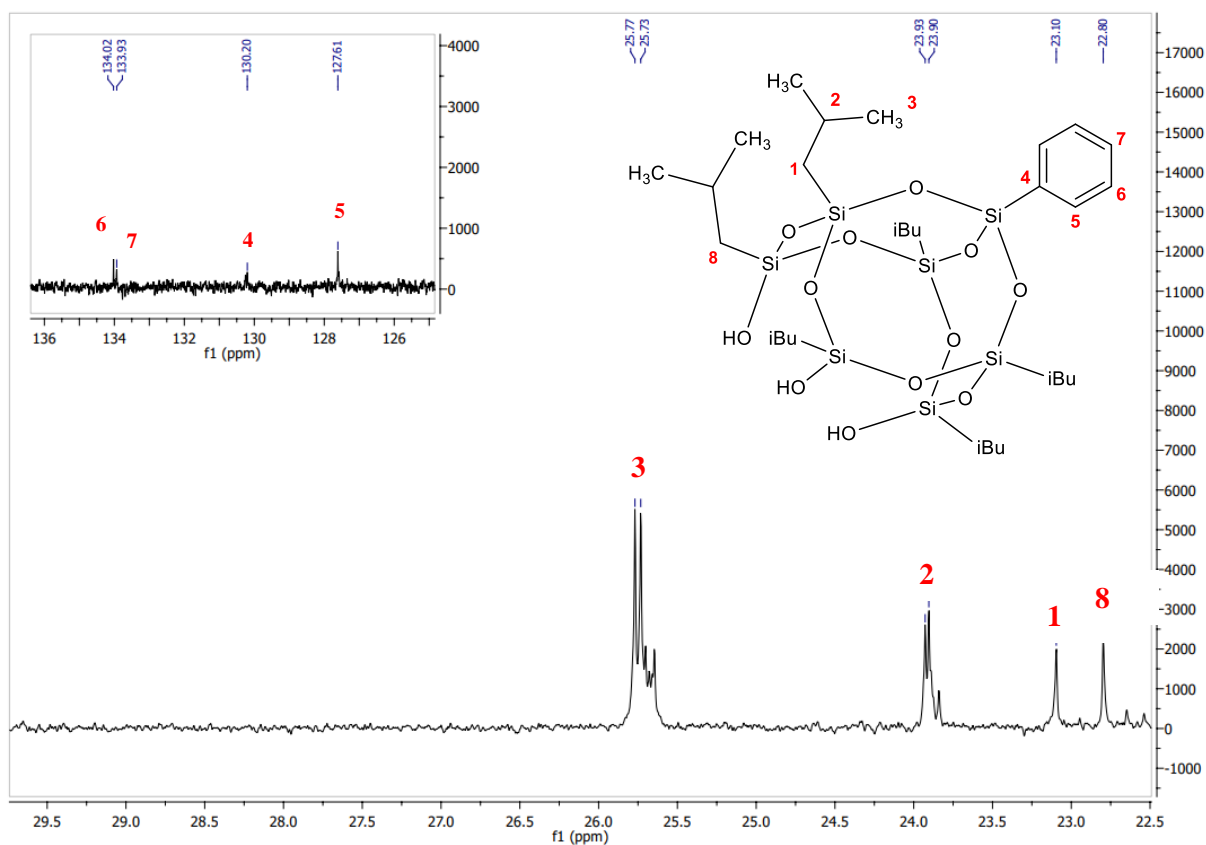

**Figure S7.**  $^{13}\text{C}$  NMR (500 MHz,  $\text{CDCl}_3$ , 300 K) spectrum of **2**.

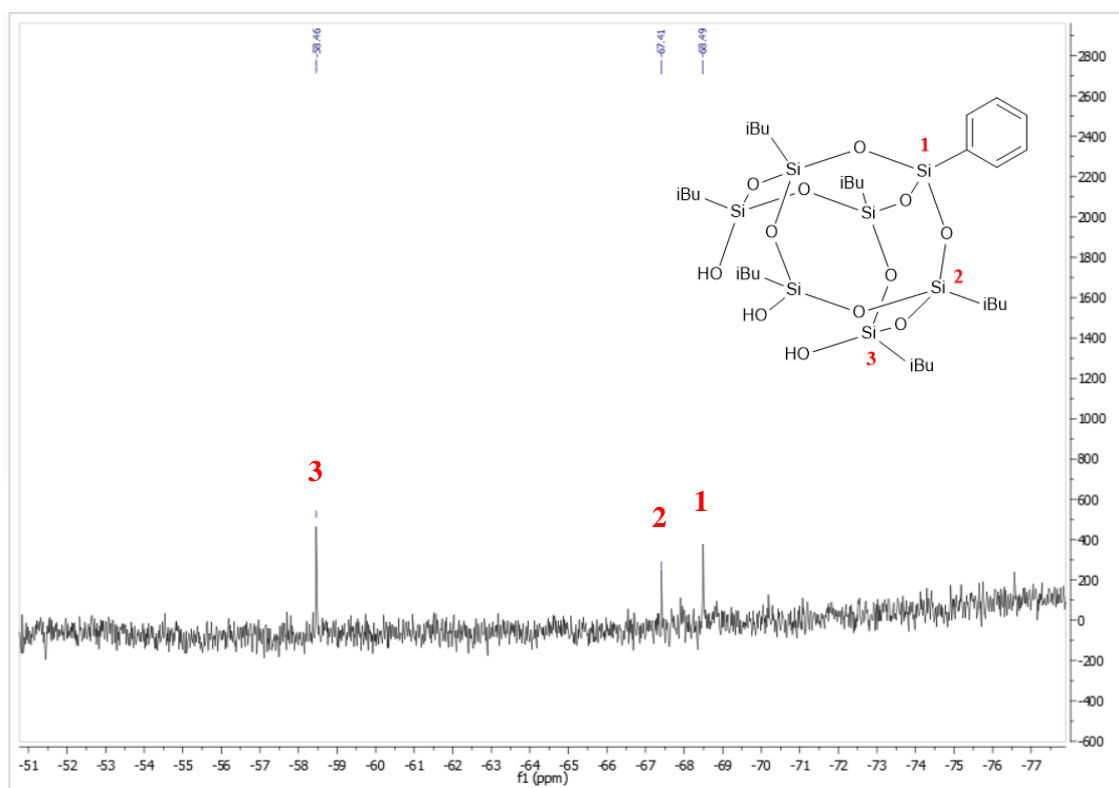

**Figure S8.**  $^{29}\text{Si}$  NMR (600 MHz,  $\text{CDCl}_3$ , 300K) spectrum of **2**.

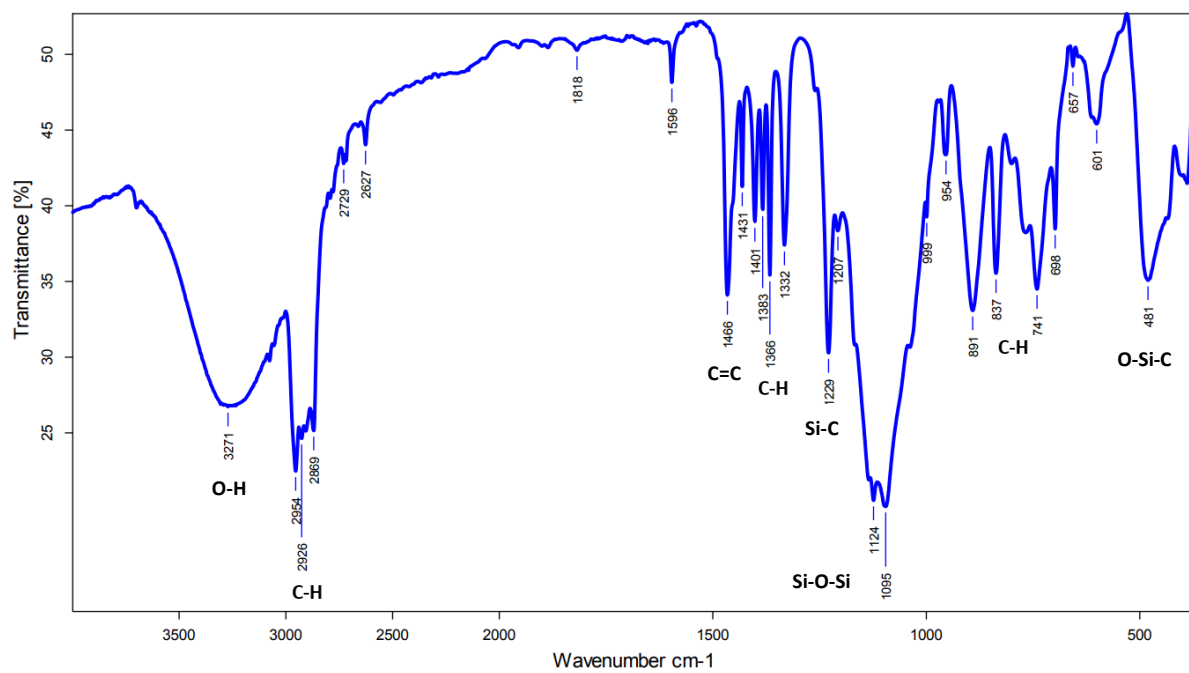

**Figure S9.** FT-IR spectrum (KBr pellet) of **2**.

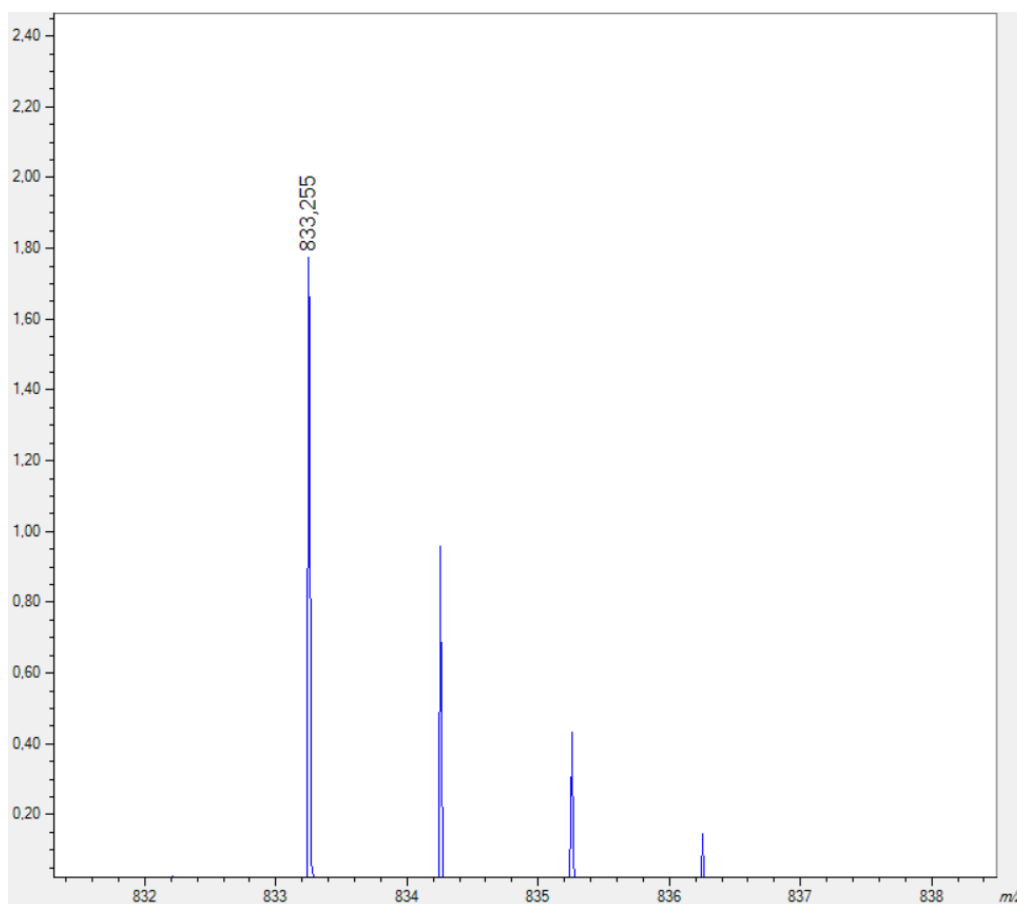

**Figure S10.** MALDI-MS of **2**.

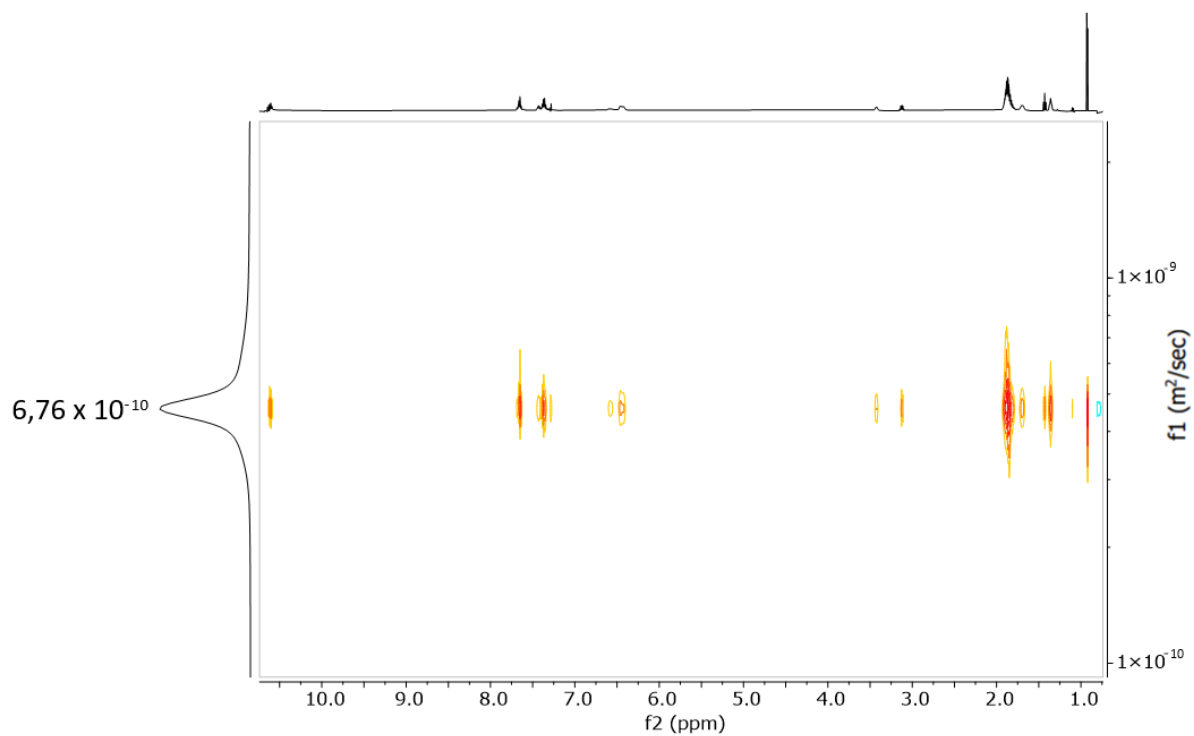

**Figure S11.** DOSY NMR of **2**.

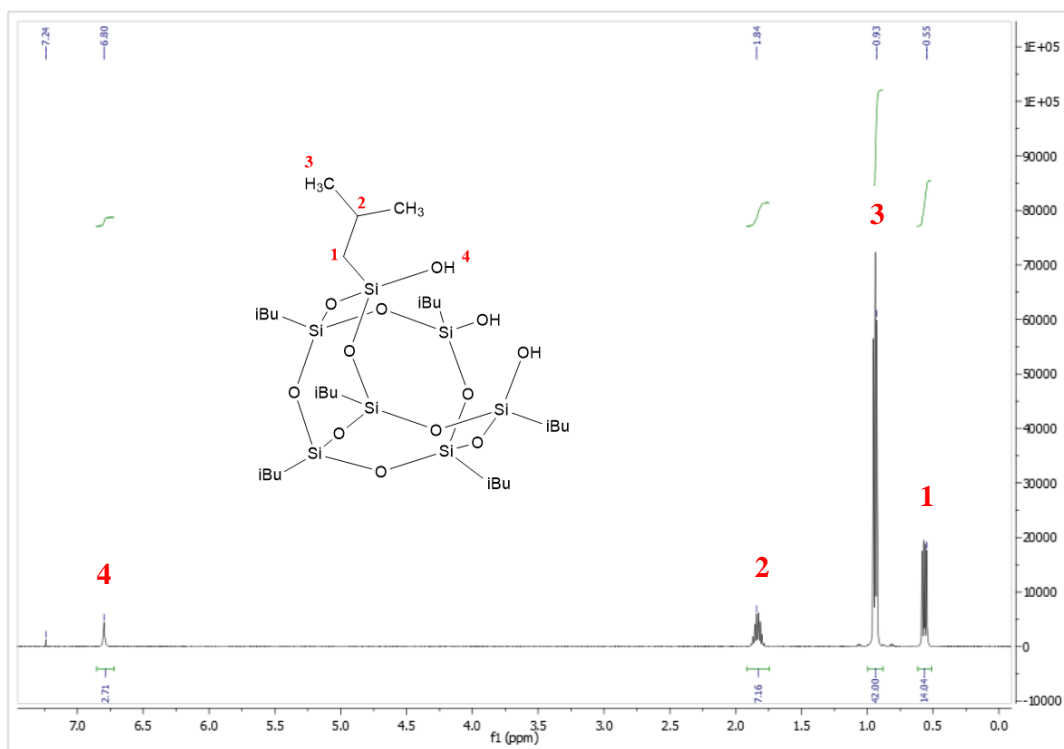

**Figure S12.**  $^1\text{H}$  NMR (500 MHz,  $\text{CDCl}_3$ , 300 K) spectrum of **3**.



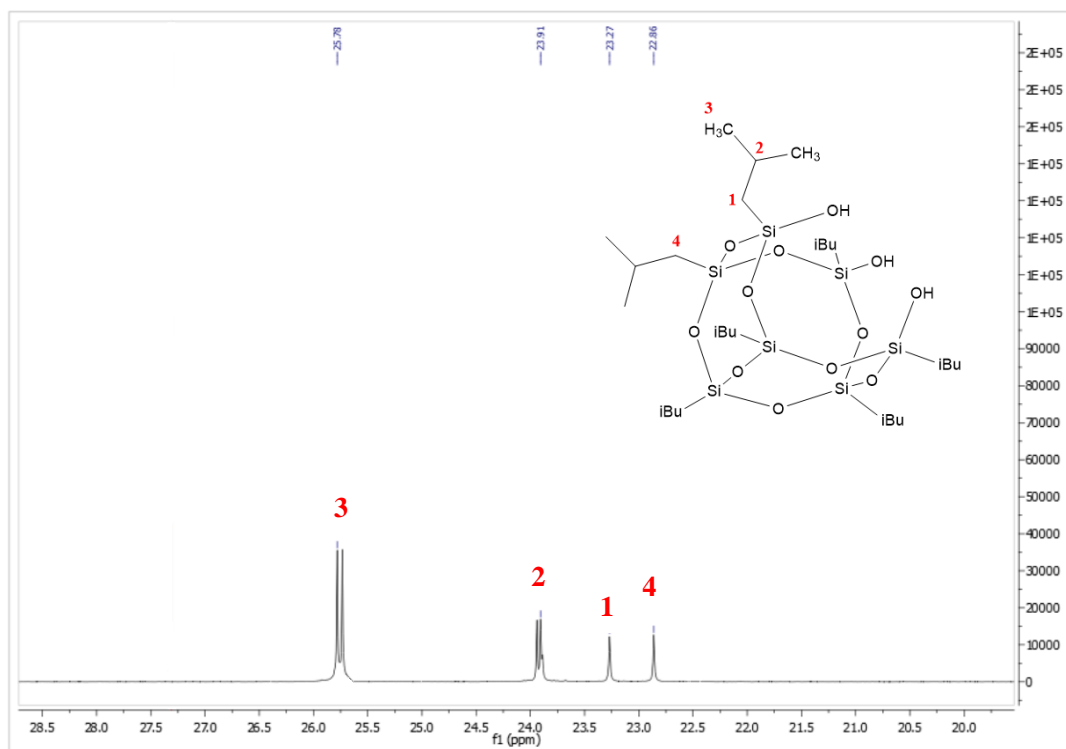

Figure S13.  $^{13}\text{C}$  NMR (500 MHz,  $\text{CDCl}_3$ , 300 K) spectrum of **3**.

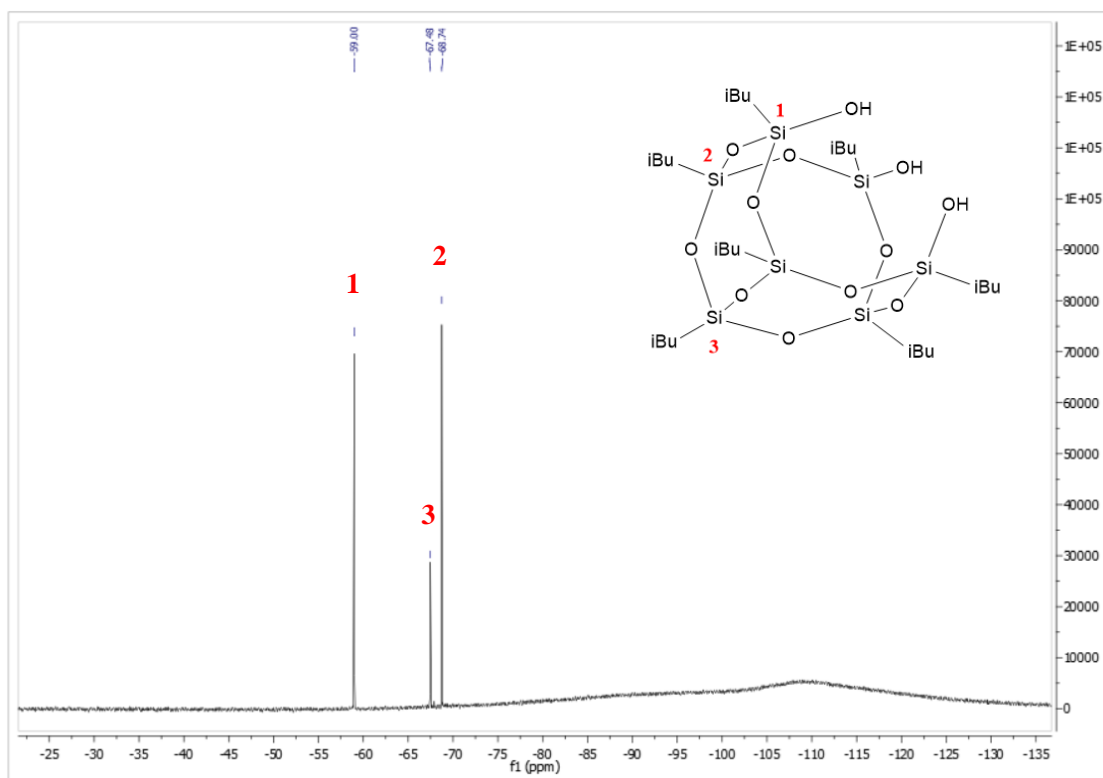

Figure S14.  $^{29}\text{Si}$  NMR (600 MHz,  $\text{CDCl}_3$ , 300K) spectrum of **3**.

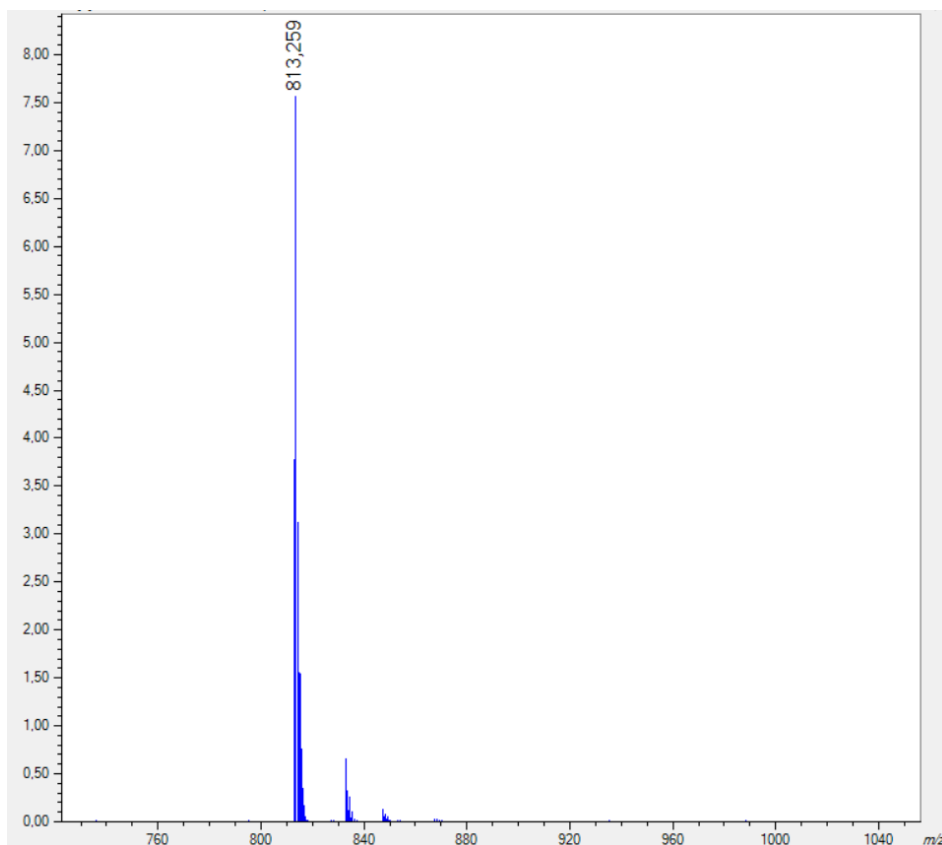

**Figure S15.** MALDI-MS of **3**.

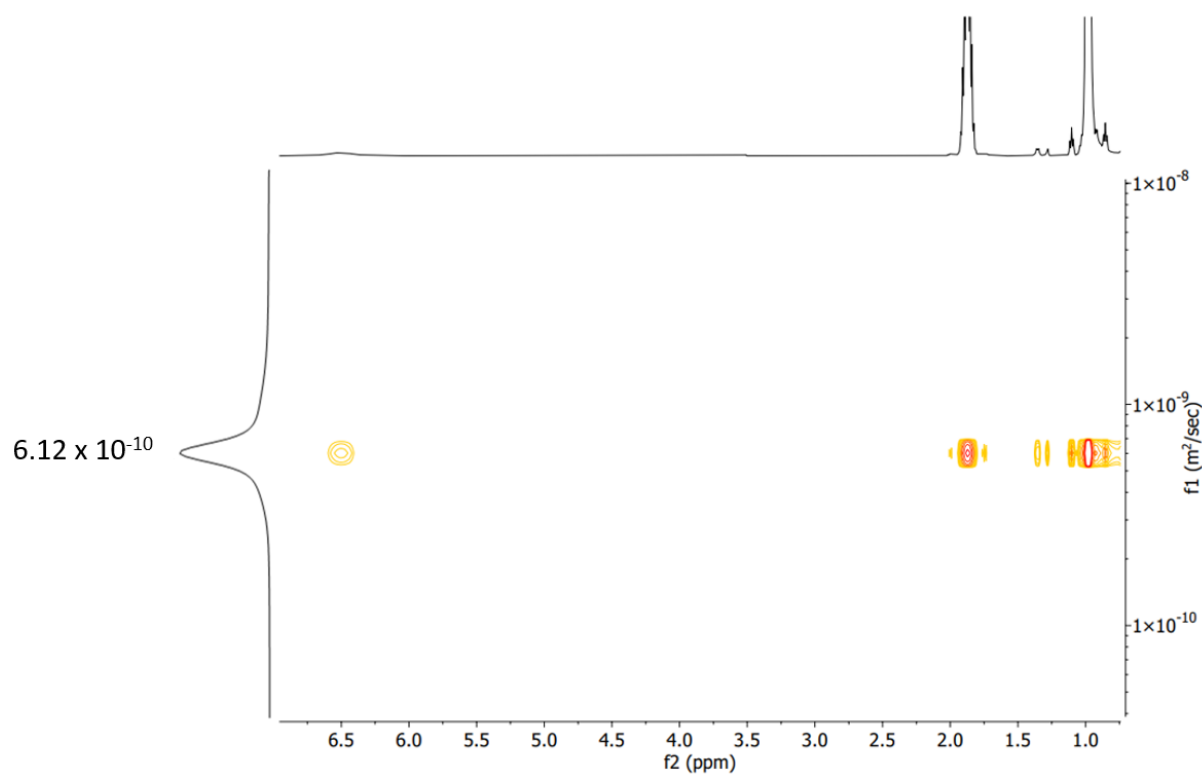

**Figure S16.** DOSY NMR of **3**.

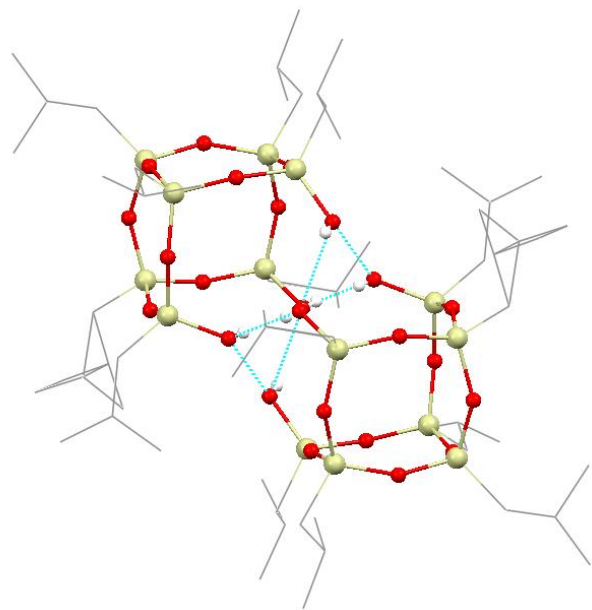

**Figure S17.** Molecular structure of **3**.

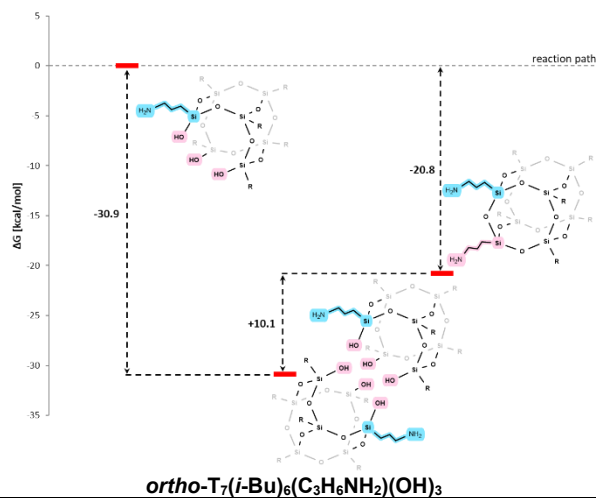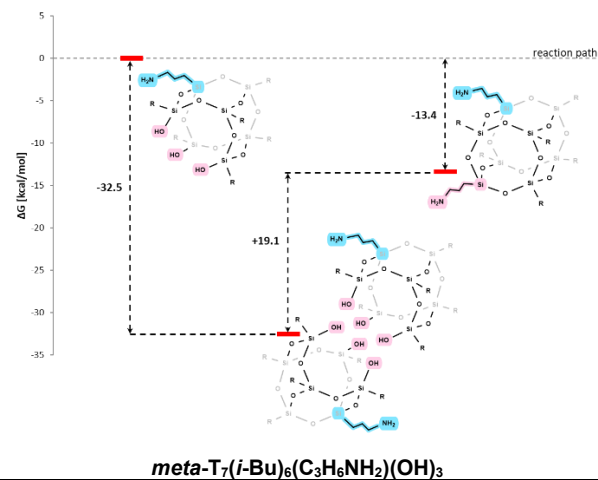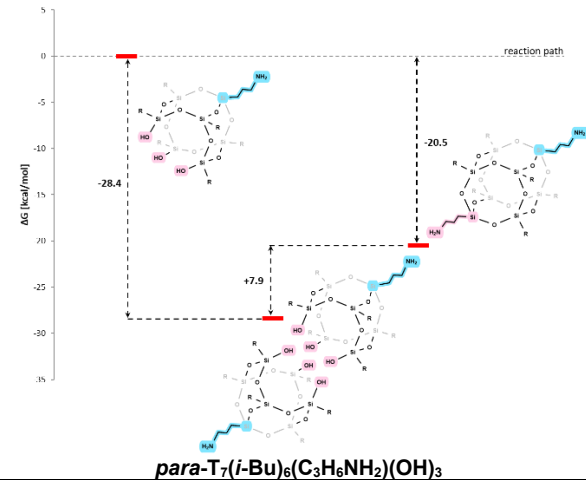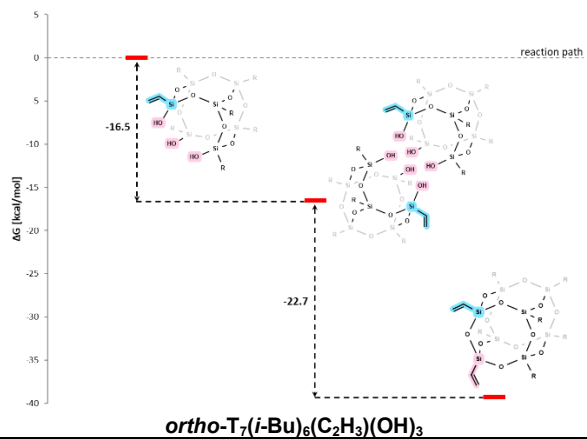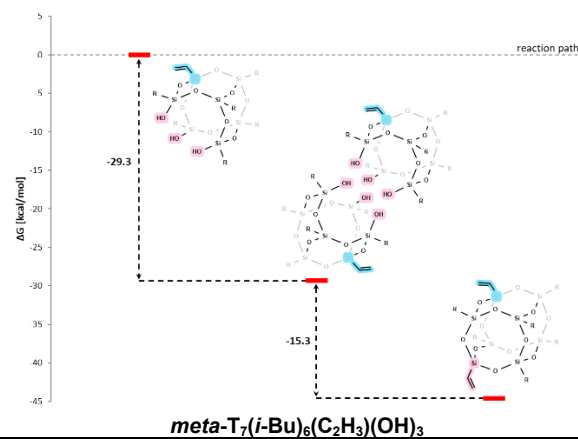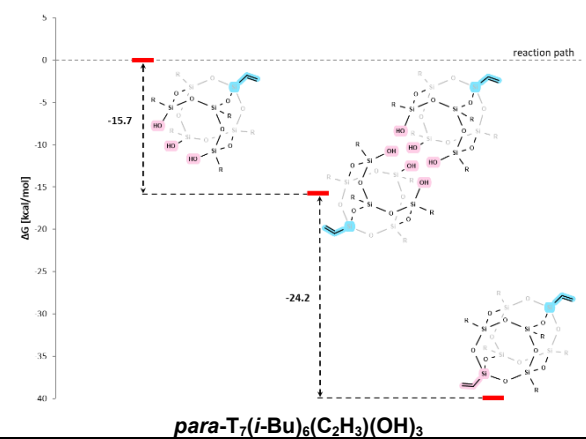

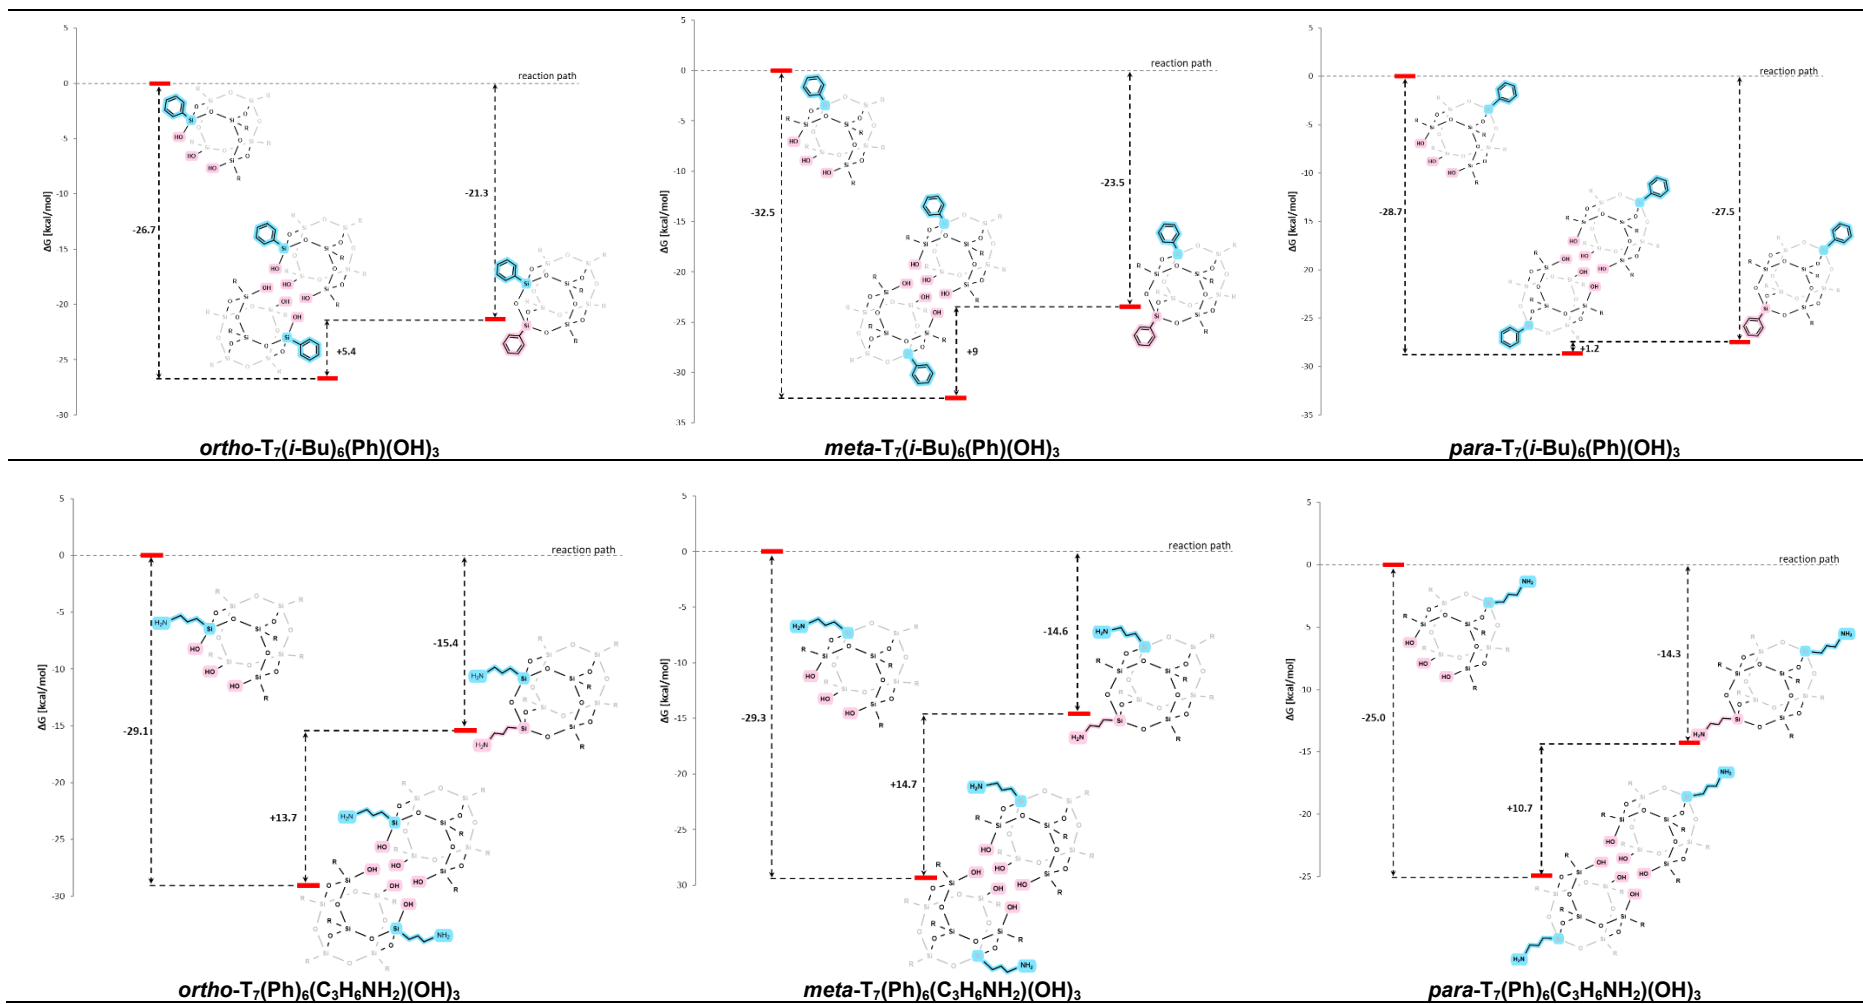

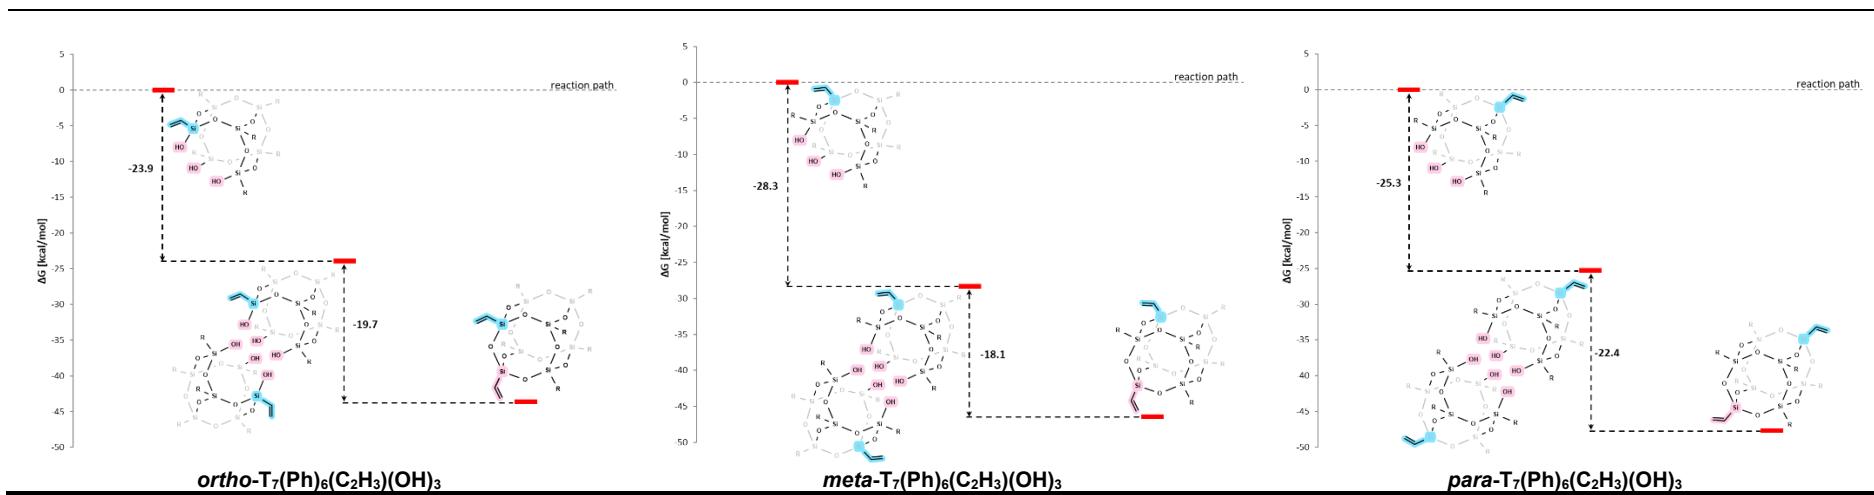

**Figure S18.** Relative Gibbs free energies (kcal/mol) for DFT optimized POSS structures.

**Table S1.** The calculated HOMO-LUMO energy gaps and quantum chemical properties of POSS complexes. Data are given in eV.

|                                                                                                                      | Molecular Orbitals | Energy | Energy gap | Ionization potential (I) | Electron affinity (A) | Global hardness ( $\eta$ ) | Electronegativity ( $\chi$ ) | Chemical potential ( $\mu_e$ ) | Global softness ( $\sigma^a$ ) | Global electrophilicity ( $\omega$ ) |
|----------------------------------------------------------------------------------------------------------------------|--------------------|--------|------------|--------------------------|-----------------------|----------------------------|------------------------------|--------------------------------|--------------------------------|--------------------------------------|
| <b>T<sub>8</sub>(<i>i</i>-Bu)<sub>8</sub></b>                                                                        | HOMO               | -7.72  | 8.60       | 7.72                     | -0.88                 | 4.30                       | 3.42                         | -3.42                          | 0.12                           | 1.36                                 |
|                                                                                                                      | LUMO               | 0.88   |            |                          |                       |                            |                              |                                |                                |                                      |
| <b>T<sub>8</sub>(<i>i</i>-Bu)<sub>8</sub></b>                                                                        | HOMO               | -7.77  | 8.53       | 7.77                     | -0.77                 | 4.27                       | 3.50                         | -3.50                          | 0.12                           | 1.44                                 |
|                                                                                                                      | LUMO               | 0.77   |            |                          |                       |                            |                              |                                |                                |                                      |
| <b>T<sub>8</sub>(<i>i</i>-Bu)<sub>7</sub>(C<sub>3</sub>H<sub>6</sub>NH<sub>2</sub>)</b>                              | HOMO               | -6.42  | 7.36       | 6.42                     | -0.94                 | 3.68                       | 2.74                         | -2.74                          | 0.14                           | 1.02                                 |
|                                                                                                                      | LUMO               | 0.94   |            |                          |                       |                            |                              |                                |                                |                                      |
| <b><i>ortho</i>-T<sub>7</sub>(<i>i</i>-Bu)<sub>6</sub>(C<sub>3</sub>H<sub>6</sub>NH<sub>2</sub>)(OH)<sub>3</sub></b> | HOMO               | -6.26  | 6.93       | 6.26                     | -0.67                 | 3.47                       | 2.80                         | -2.80                          | 0.14                           | 1.13                                 |
|                                                                                                                      | LUMO               | 0.67   |            |                          |                       |                            |                              |                                |                                |                                      |
| <b><i>meta</i>-T<sub>7</sub>(<i>i</i>-Bu)<sub>6</sub>(C<sub>3</sub>H<sub>6</sub>NH<sub>2</sub>)(OH)<sub>3</sub></b>  | HOMO               | -6.46  | 7.31       | 6.46                     | -0.86                 | 3.66                       | 2.80                         | -2.80                          | 0.14                           | 1.07                                 |
|                                                                                                                      | LUMO               | 0.86   |            |                          |                       |                            |                              |                                |                                |                                      |
| <b><i>para</i>-T<sub>7</sub>(<i>i</i>-Bu)<sub>6</sub>(C<sub>3</sub>H<sub>6</sub>NH<sub>2</sub>)(OH)<sub>3</sub></b>  | HOMO               | -6.37  | 7.04       | 6.37                     | -0.67                 | 3.52                       | 2.85                         | -2.85                          | 0.14                           | 1.15                                 |
|                                                                                                                      | LUMO               | 0.67   |            |                          |                       |                            |                              |                                |                                |                                      |
| <b>T<sub>8</sub>(<i>i</i>-Bu)<sub>7</sub>(C<sub>2</sub>H<sub>3</sub>)</b>                                            | HOMO               | -7.44  | 7.26       | 7.44                     | 0.19                  | 3.63                       | 3.82                         | -3.82                          | 0.14                           | 2.01                                 |
|                                                                                                                      | LUMO               | -0.19  |            |                          |                       |                            |                              |                                |                                |                                      |
| <b><i>ortho</i>-T<sub>7</sub>(<i>i</i>-Bu)<sub>6</sub>(C<sub>2</sub>H<sub>3</sub>)(OH)<sub>3</sub></b>               | HOMO               | -7.45  | 7.25       | 7.45                     | 0.20                  | 3.63                       | 3.82                         | -3.82                          | 0.14                           | 2.02                                 |
|                                                                                                                      | LUMO               | -0.20  |            |                          |                       |                            |                              |                                |                                |                                      |
| <b><i>meta</i>-T<sub>7</sub>(<i>i</i>-Bu)<sub>6</sub>(C<sub>2</sub>H<sub>3</sub>)(OH)<sub>3</sub></b>                | HOMO               | -7.56  | 7.20       | 7.56                     | 0.36                  | 3.60                       | 3.96                         | -3.96                          | 0.14                           | 2.17                                 |
|                                                                                                                      | LUMO               | -0.36  |            |                          |                       |                            |                              |                                |                                |                                      |
| <b><i>para</i>-T<sub>7</sub>(<i>i</i>-Bu)<sub>6</sub>(C<sub>2</sub>H<sub>3</sub>)(OH)<sub>3</sub></b>                | HOMO               | -7.51  | 7.24       | 7.51                     | 0.27                  | 3.62                       | 3.89                         | -3.89                          | 0.14                           | 2.09                                 |
|                                                                                                                      | LUMO               | -0.27  |            |                          |                       |                            |                              |                                |                                |                                      |
| <b>T<sub>8</sub>(<i>i</i>-Bu)<sub>7</sub>(Ph)</b>                                                                    | HOMO               | -6.85  | 6.37       | 6.85                     | 0.48                  | 3.19                       | 3.66                         | -3.66                          | 0.16                           | 2.10                                 |
|                                                                                                                      | LUMO               | -0.48  |            |                          |                       |                            |                              |                                |                                |                                      |
| <b><i>ortho</i>-T<sub>7</sub>(<i>i</i>-Bu)<sub>6</sub>(Ph)(OH)<sub>3</sub></b>                                       | HOMO               | -6.81  | 6.39       | 6.81                     | 0.42                  | 3.19                       | 3.61                         | -3.61                          | 0.16                           | 2.04                                 |
|                                                                                                                      | LUMO               | -0.42  |            |                          |                       |                            |                              |                                |                                |                                      |
| <b><i>meta</i>-T<sub>7</sub>(<i>i</i>-Bu)<sub>6</sub>(Ph)(OH)<sub>3</sub></b>                                        | HOMO               | -6.92  | 6.37       | 6.92                     | 0.55                  | 3.18                       | 3.73                         | -3.73                          | 0.16                           | 2.19                                 |
|                                                                                                                      | LUMO               | -0.55  |            |                          |                       |                            |                              |                                |                                |                                      |
| <b><i>para</i>-T<sub>7</sub>(<i>i</i>-Bu)<sub>6</sub>(Ph)(OH)<sub>3</sub></b>                                        | HOMO               | -6.86  | 6.38       | 6.86                     | 0.48                  | 3.19                       | 3.67                         | -3.67                          | 0.16                           | 2.12                                 |
|                                                                                                                      | LUMO               | -0.48  |            |                          |                       |                            |                              |                                |                                |                                      |
| <b>T<sub>8</sub>(Ph)<sub>8</sub></b>                                                                                 | HOMO               | -6.69  | 6.12       | 6.69                     | 0.56                  | 3.06                       | 3.62                         | -3.62                          | 0.16                           | 2.14                                 |
|                                                                                                                      | LUMO               | -0.56  |            |                          |                       |                            |                              |                                |                                |                                      |
| <b>T<sub>7</sub>(Ph)<sub>7</sub>(H)<sub>3</sub></b>                                                                  | HOMO               | -6.68  | 6.10       | 6.68                     | 0.58                  | 3.05                       | 3.63                         | -3.63                          | 0.16                           | 2.17                                 |
|                                                                                                                      | LUMO               | -0.58  |            |                          |                       |                            |                              |                                |                                |                                      |

|                                                                                                                  |      |       |      |      |      |      |      |       |      |      |
|------------------------------------------------------------------------------------------------------------------|------|-------|------|------|------|------|------|-------|------|------|
| <b>T<sub>8</sub>(Ph)<sub>7</sub>(C<sub>3</sub>H<sub>6</sub>NH<sub>2</sub>)</b>                                   | HOMO | -6.24 | 5.72 | 6.24 | 0.52 | 2.86 | 3.38 | -3.38 | 0.17 | 2.00 |
|                                                                                                                  | LUMO | -0.52 |      |      |      |      |      |       |      |      |
| <i>ortho</i> -T <sub>7</sub> (Ph) <sub>6</sub> (C <sub>3</sub> H <sub>6</sub> NH <sub>2</sub> )(OH) <sub>3</sub> | HOMO | -6.21 | 5.62 | 6.21 | 0.59 | 2.81 | 3.40 | -3.40 | 0.18 | 2.06 |
|                                                                                                                  | LUMO | -0.59 |      |      |      |      |      |       |      |      |
| <i>meta</i> -T <sub>7</sub> (Ph) <sub>6</sub> (C <sub>3</sub> H <sub>6</sub> NH <sub>2</sub> )(OH) <sub>3</sub>  | HOMO | -6.19 | 5.60 | 6.19 | 0.59 | 2.80 | 3.39 | -3.39 | 0.18 | 2.05 |
|                                                                                                                  | LUMO | -0.59 |      |      |      |      |      |       |      |      |
| <i>para</i> -T <sub>7</sub> (Ph) <sub>6</sub> (C <sub>3</sub> H <sub>6</sub> NH <sub>2</sub> )(OH) <sub>3</sub>  | HOMO | -6.37 | 5.79 | 6.37 | 0.58 | 2.89 | 3.47 | -3.47 | 0.17 | 2.09 |
|                                                                                                                  | LUMO | -0.58 |      |      |      |      |      |       |      |      |
| <b>T<sub>8</sub>(Ph)<sub>7</sub>(C<sub>2</sub>H<sub>3</sub>)</b>                                                 | HOMO | -6.67 | 6.11 | 6.67 | 0.56 | 3.06 | 3.61 | -3.61 | 0.16 | 2.13 |
|                                                                                                                  | LUMO | -0.56 |      |      |      |      |      |       |      |      |
| <i>ortho</i> -T <sub>7</sub> (Ph) <sub>6</sub> (C <sub>2</sub> H <sub>3</sub> )(OH) <sub>3</sub>                 | HOMO | -6.68 | 6.09 | 6.68 | 0.59 | 3.04 | 3.64 | -3.64 | 0.16 | 2.17 |
|                                                                                                                  | LUMO | -0.59 |      |      |      |      |      |       |      |      |
| <i>meta</i> -T <sub>7</sub> (Ph) <sub>6</sub> (C <sub>2</sub> H <sub>3</sub> )(OH) <sub>3</sub>                  | HOMO | -6.65 | 6.04 | 6.65 | 0.60 | 3.02 | 3.62 | -3.62 | 0.17 | 2.17 |
|                                                                                                                  | LUMO | -0.60 |      |      |      |      |      |       |      |      |
| <i>para</i> -T <sub>7</sub> (Ph) <sub>6</sub> (C <sub>2</sub> H <sub>3</sub> )(OH) <sub>3</sub>                  | HOMO | -6.63 | 6.02 | 6.63 | 0.61 | 3.01 | 3.62 | -3.62 | 0.17 | 2.18 |
|                                                                                                                  | LUMO | -0.61 |      |      |      |      |      |       |      |      |

<sup>a</sup> data are given in eV<sup>-1</sup>

$$I = -E_{HOMO}; A = -E_{LUMO}; \eta = \frac{I-A}{2}; \chi = \frac{I+A}{2}; \mu_c = -\chi; \sigma = \frac{1}{2\eta}; \omega = \frac{\mu^2}{2\eta}$$



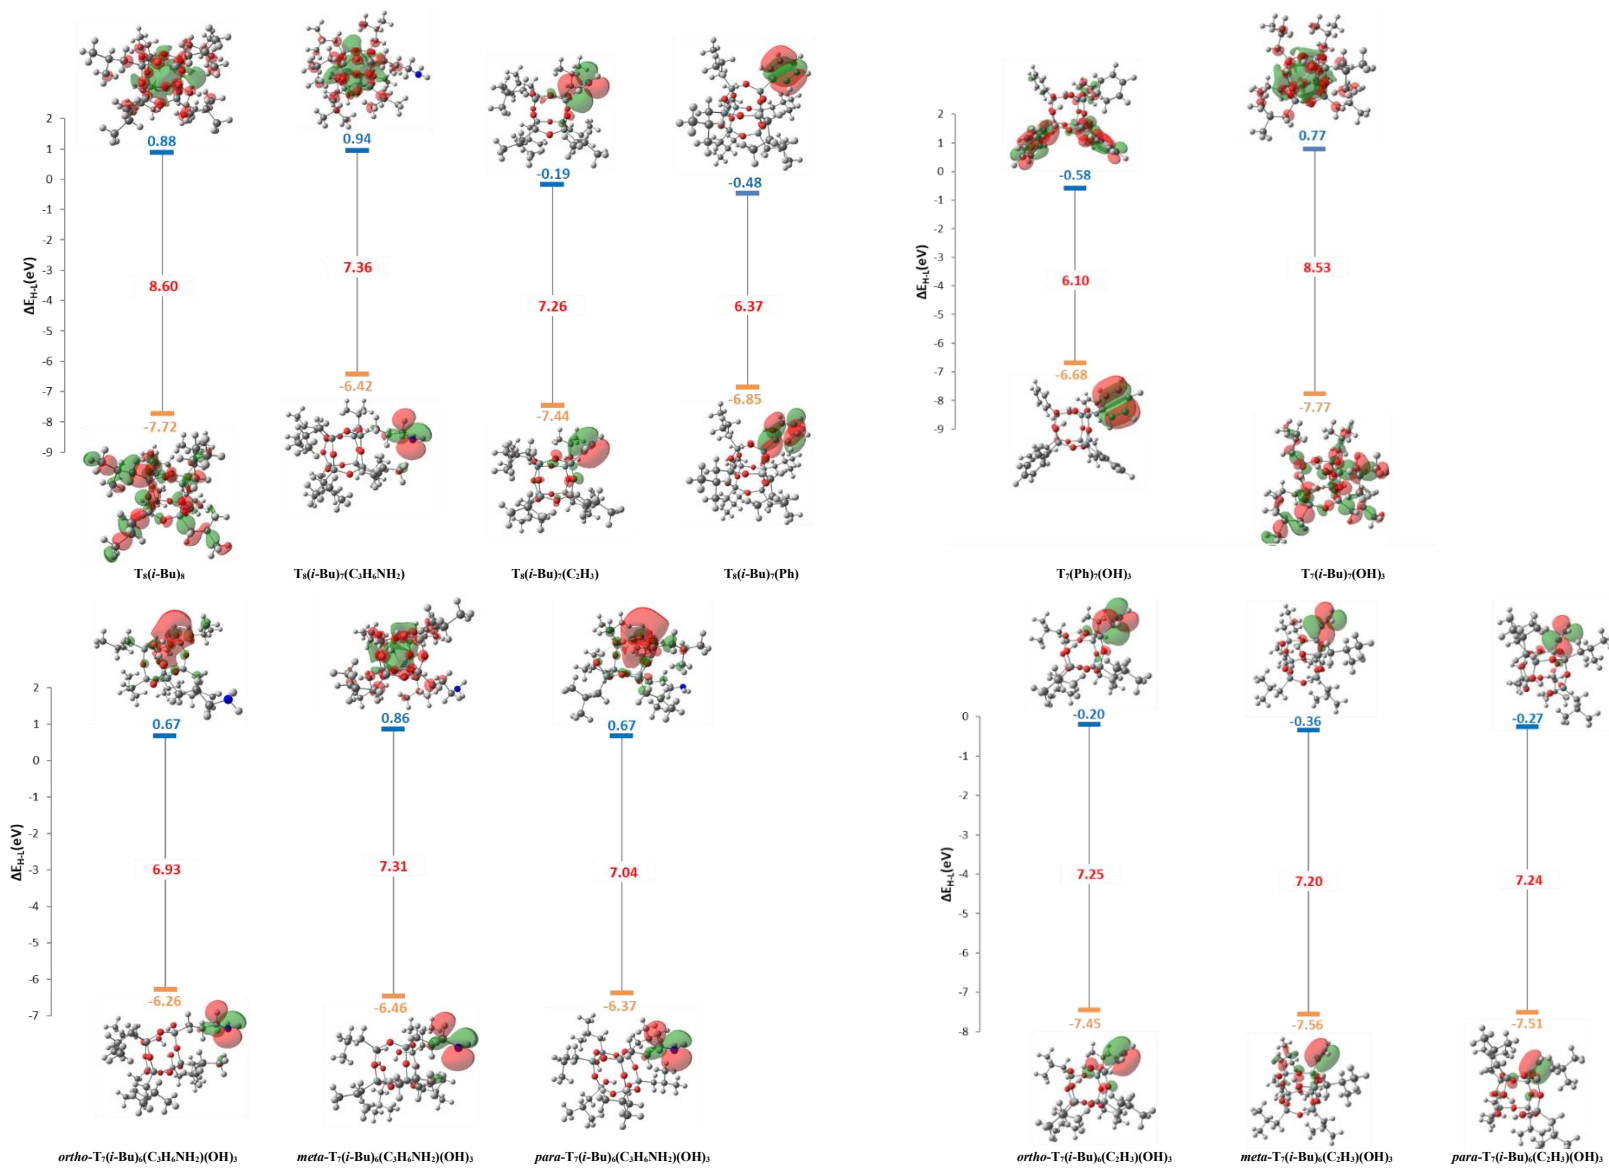

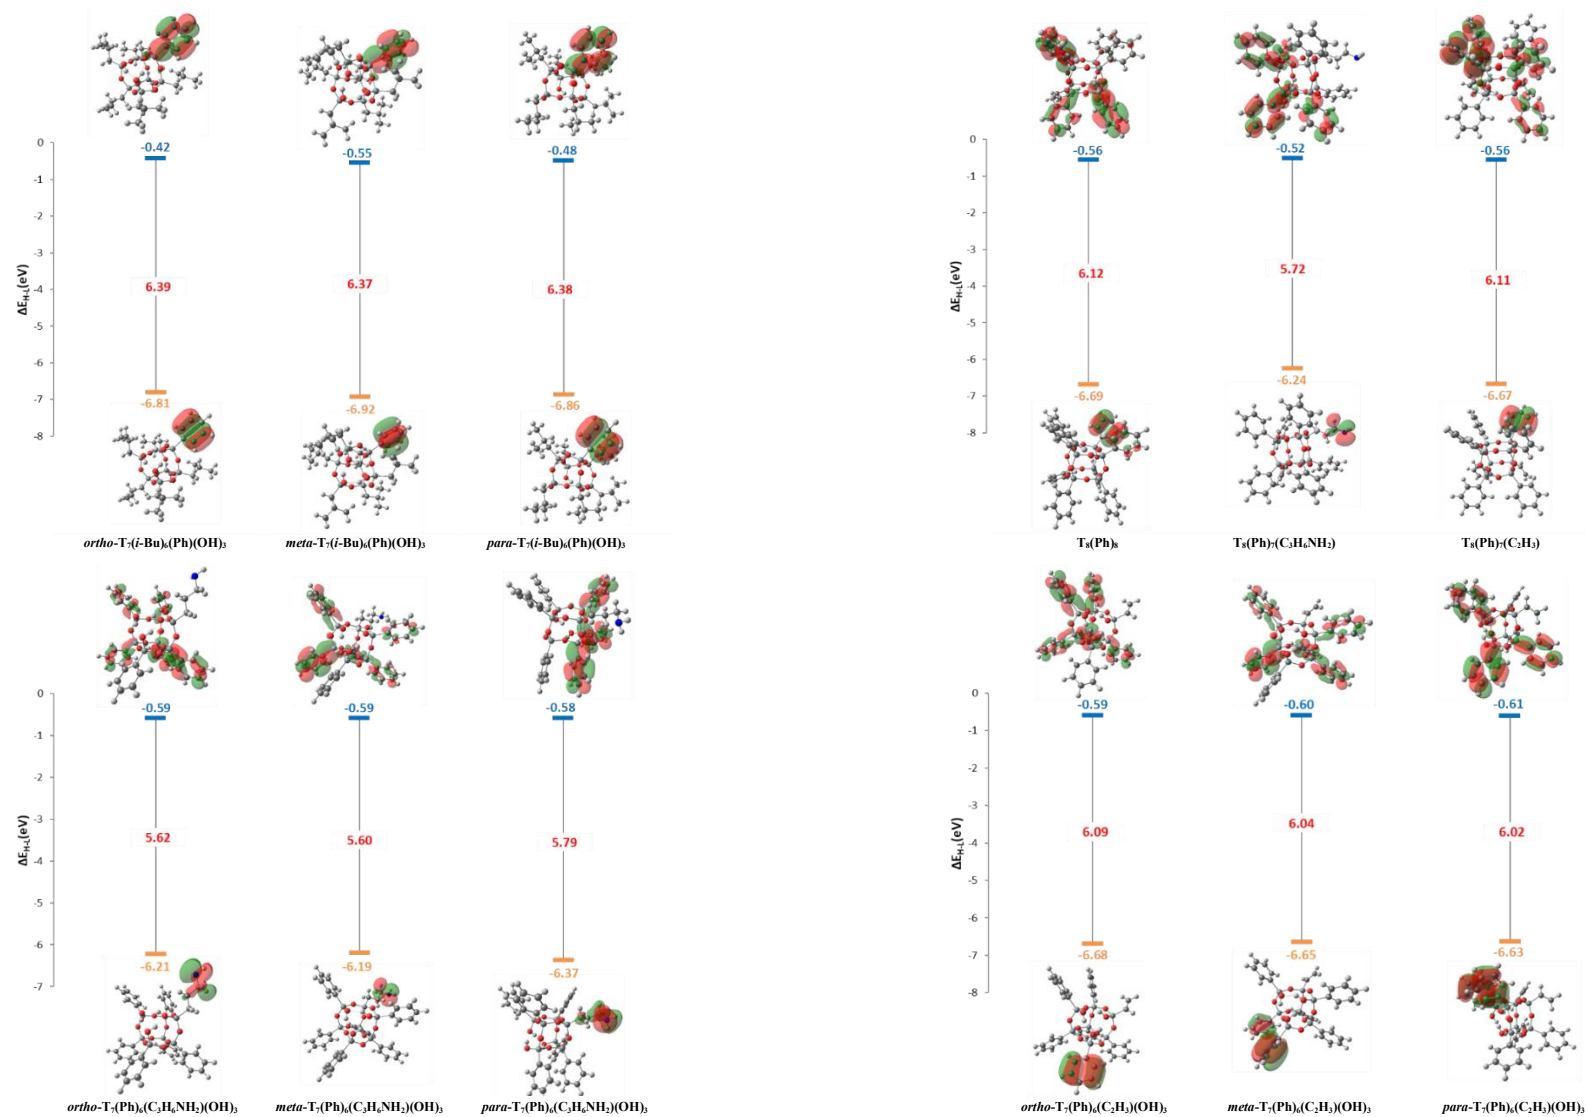

**Figure S19.** The calculated HOMO (orange) and LUMO (blue) energy levels and their visualization, and HOMO-LUMO energy gaps (red) of optimized POSS models. HOMO – orange; LUMO – blue;  $\Delta E_{H-L}$  – red

**Table S2.** Energies of calculated POSS models. Data are given in kcal/mol.

|                                                                                         | $E_{\text{tot}}$                                                                                                      | $E_{\text{tot}} + \text{ZPE}$ | H        | G        | $S^a$    |       |
|-----------------------------------------------------------------------------------------|-----------------------------------------------------------------------------------------------------------------------|-------------------------------|----------|----------|----------|-------|
| <b>T<sub>8</sub>(<i>i</i>-Bu)<sub>8</sub></b>                                           | -2813122                                                                                                              | -2812459                      | -2812416 | -2812524 | 0.365    |       |
| <b>T<sub>7</sub>(<i>i</i>-Bu)<sub>7</sub>(OH)<sub>3</sub></b>                           | -2533419                                                                                                              | -2532815                      | -2532775 | -2532877 | 0.344    |       |
| <b>[T<sub>7</sub>(<i>i</i>-Bu)<sub>7</sub>(OH)<sub>3</sub>]<sub>2</sub></b>             | -5066879                                                                                                              | -5065669                      | -5065589 | -5065776 | 0.625    |       |
| <b>T<sub>8</sub>(<i>i</i>-Bu)<sub>7</sub>(C<sub>3</sub>H<sub>6</sub>NH<sub>2</sub>)</b> | -2823175                                                                                                              | -2822518                      | -2822475 | -2822584 | 0.365    |       |
| <i>ortho</i>                                                                            | <b>T<sub>7</sub>(<i>i</i>-Bu)<sub>6</sub>(C<sub>3</sub>H<sub>6</sub>NH<sub>2</sub>)(OH)<sub>3</sub></b>               | -2543470                      | -2542872 | -2542833 | -2542935 | 0.342 |
|                                                                                         | <b>[T<sub>7</sub>(<i>i</i>-Bu)<sub>6</sub>(C<sub>3</sub>H<sub>6</sub>NH<sub>2</sub>)(OH)<sub>3</sub>]<sub>2</sub></b> | -5086989                      | -5085792 | -5085712 | -5085901 | 0.631 |
|                                                                                         | <b>T<sub>8</sub>(<i>i</i>-Bu)<sub>6</sub>(C<sub>3</sub>H<sub>6</sub>NH<sub>2</sub>)<sub>2</sub></b>                   | -2833231                      | -2832580 | -2832537 | -2832646 | 0.364 |
| <i>meta</i>                                                                             | <b>T<sub>7</sub>(<i>i</i>-Bu)<sub>6</sub>(C<sub>3</sub>H<sub>6</sub>NH<sub>2</sub>)(OH)<sub>3</sub></b>               | -2543473                      | -2542875 | -2542836 | -2542938 | 0.344 |
|                                                                                         | <b>[T<sub>7</sub>(<i>i</i>-Bu)<sub>6</sub>(C<sub>3</sub>H<sub>6</sub>NH<sub>2</sub>)(OH)<sub>3</sub>]<sub>2</sub></b> | -5086997                      | -5085800 | -5085721 | -5085909 | 0.631 |
|                                                                                         | <b>T<sub>8</sub>(<i>i</i>-Bu)<sub>6</sub>(C<sub>3</sub>H<sub>6</sub>NH<sub>2</sub>)<sub>2</sub></b>                   | -2833229                      | -2832579 | -2832536 | -2832646 | 0.368 |
| <i>para</i>                                                                             | <b>T<sub>7</sub>(<i>i</i>-Bu)<sub>6</sub>(C<sub>3</sub>H<sub>6</sub>NH<sub>2</sub>)(OH)<sub>3</sub></b>               | -2543470                      | -2542873 | -2542833 | -2542935 | 0.340 |
|                                                                                         | <b>[T<sub>7</sub>(<i>i</i>-Bu)<sub>6</sub>(C<sub>3</sub>H<sub>6</sub>NH<sub>2</sub>)(OH)<sub>3</sub>]<sub>2</sub></b> | -5086989                      | -5085792 | -5085713 | -5085898 | 0.619 |
|                                                                                         | <b>T<sub>8</sub>(<i>i</i>-Bu)<sub>6</sub>(C<sub>3</sub>H<sub>6</sub>NH<sub>2</sub>)<sub>2</sub></b>                   | -2833229                      | -2832579 | -2832536 | -2832645 | 0.367 |
| <b>T<sub>8</sub>(<i>i</i>-Bu)<sub>7</sub>(C<sub>2</sub>H<sub>3</sub>)</b>               | -2762997                                                                                                              | -2762384                      | -2762343 | -2762449 | 0.358    |       |
| <i>ortho</i>                                                                            | <b>T<sub>7</sub>(<i>i</i>-Bu)<sub>6</sub>(C<sub>2</sub>H<sub>3</sub>)(OH)<sub>3</sub></b>                             | -2483295                      | -2482742 | -2482704 | -2482805 | 0.338 |
|                                                                                         | <b>[T<sub>7</sub>(<i>i</i>-Bu)<sub>6</sub>(C<sub>2</sub>H<sub>3</sub>)(OH)<sub>3</sub>]<sub>2</sub></b>               | -4966633                      | -4965524 | -4965448 | -4965626 | 0.595 |
|                                                                                         | <b>T<sub>8</sub>(<i>i</i>-Bu)<sub>6</sub>(C<sub>2</sub>H<sub>3</sub>)<sub>2</sub></b>                                 | -2712874                      | -2712312 | -2712273 | -2712373 | 0.337 |
| <i>meta</i>                                                                             | <b>T<sub>7</sub>(<i>i</i>-Bu)<sub>6</sub>(C<sub>2</sub>H<sub>3</sub>)(OH)<sub>3</sub></b>                             | -2483297                      | -2482743 | -2482706 | -2482803 | 0.326 |
|                                                                                         | <b>[T<sub>7</sub>(<i>i</i>-Bu)<sub>6</sub>(C<sub>2</sub>H<sub>3</sub>)(OH)<sub>3</sub>]<sub>2</sub></b>               | -4966644                      | -4965534 | -4965460 | -4965635 | 0.589 |
|                                                                                         | <b>T<sub>8</sub>(<i>i</i>-Bu)<sub>6</sub>(C<sub>2</sub>H<sub>3</sub>)<sub>2</sub></b>                                 | -2712875                      | -2712312 | -2712273 | -2712374 | 0.339 |
| <i>para</i>                                                                             | <b>T<sub>7</sub>(<i>i</i>-Bu)<sub>6</sub>(C<sub>2</sub>H<sub>3</sub>)(OH)<sub>3</sub></b>                             | -2483297                      | -2482744 | -2482706 | -2482804 | 0.330 |
|                                                                                         | <b>[T<sub>7</sub>(<i>i</i>-Bu)<sub>6</sub>(C<sub>2</sub>H<sub>3</sub>)(OH)<sub>3</sub>]<sub>2</sub></b>               | -4966635                      | -4965525 | -4965450 | -4965625 | 0.586 |
|                                                                                         | <b>T<sub>8</sub>(<i>i</i>-Bu)<sub>6</sub>(C<sub>2</sub>H<sub>3</sub>)<sub>2</sub></b>                                 | -2712874                      | -2712312 | -2712273 | -2712373 | 0.338 |
| <b>T<sub>8</sub>(<i>i</i>-Bu)<sub>7</sub>(Ph)</b>                                       | -2859426                                                                                                              | -2858782                      | -2858740 | -2858849 | 0.365    |       |
| <i>ortho</i>                                                                            | <b>T<sub>7</sub>(<i>i</i>-Bu)<sub>6</sub>(Ph)(OH)<sub>3</sub></b>                                                     | -2579723                      | -2579139 | -2579100 | -2579202 | 0.344 |
|                                                                                         | <b>[T<sub>7</sub>(<i>i</i>-Bu)<sub>6</sub>(Ph)(OH)<sub>3</sub>]<sub>2</sub></b>                                       | -5159491                      | -5158322 | -5158243 | -5158431 | 0.631 |
|                                                                                         | <b>T<sub>8</sub>(<i>i</i>-Bu)<sub>6</sub>(Ph)<sub>2</sub></b>                                                         | -2905731                      | -2905108 | -2905066 | -2905175 | 0.364 |

|              |                                                                                                              |          |          |          |          |       |
|--------------|--------------------------------------------------------------------------------------------------------------|----------|----------|----------|----------|-------|
| <i>meta</i>  | <b>T<sub>7</sub>(<i>i</i>-Bu)<sub>6</sub>(Ph)(OH)<sub>3</sub></b>                                            | -2579723 | -2579139 | -2579100 | -2579203 | 0.344 |
|              | <b>[T<sub>7</sub>(<i>i</i>-Bu)<sub>6</sub>(Ph)(OH)<sub>3</sub>]<sub>2</sub></b>                              | -5159503 | -5158333 | -5158255 | -5158438 | 0.613 |
|              | <b>T<sub>8</sub>(<i>i</i>-Bu)<sub>6</sub>(Ph)<sub>2</sub></b>                                                | -2905731 | -2905108 | -2905066 | -2905176 | 0.369 |
| <i>para</i>  | <b>T<sub>7</sub>(<i>i</i>-Bu)<sub>6</sub>(Ph)(OH)<sub>3</sub></b>                                            | -2579718 | -2579135 | -2579095 | -2579198 | 0.346 |
|              | <b>[T<sub>7</sub>(<i>i</i>-Bu)<sub>6</sub>(Ph)(OH)<sub>3</sub>]<sub>2</sub></b>                              | -5159491 | -5158320 | -5158243 | -5158425 | 0.613 |
|              | <b>T<sub>8</sub>(<i>i</i>-Bu)<sub>6</sub>(Ph)<sub>2</sub></b>                                                | -2905731 | -2905107 | -2905065 | -2905174 | 0.363 |
|              | <b>T<sub>8</sub>(Ph)<sub>8</sub></b>                                                                         | -3183560 | -3183058 | -3183018 | -3183126 | 0.363 |
|              | <b>T<sub>7</sub>(Ph)<sub>7</sub>(OH)<sub>3</sub></b>                                                         | -2857554 | -2857091 | -2857054 | -2857156 | 0.339 |
|              | <b>[T<sub>7</sub>(Ph)<sub>7</sub>(OH)<sub>3</sub>]<sub>2</sub></b>                                           | -5715163 | -5714235 | -5714163 | -5714342 | 0.599 |
|              | <b>T<sub>8</sub>(Ph)<sub>7</sub>(C<sub>3</sub>H<sub>6</sub>NH<sub>2</sub>)</b>                               | -3147310 | -3146794 | -3146755 | -3146863 | 0.363 |
| <i>ortho</i> | <b>T<sub>7</sub>(Ph)<sub>6</sub>(C<sub>3</sub>H<sub>6</sub>NH<sub>2</sub>)(OH)<sub>3</sub></b>               | -2821304 | -2820827 | -2820790 | -2820892 | 0.341 |
|              | <b>[T<sub>7</sub>(Ph)<sub>6</sub>(C<sub>3</sub>H<sub>6</sub>NH<sub>2</sub>)(OH)<sub>3</sub>]<sub>2</sub></b> | -5642666 | -5641710 | -5641637 | -5641813 | 0.590 |
|              | <b>T<sub>8</sub>(Ph)<sub>6</sub>(C<sub>3</sub>H<sub>6</sub>NH<sub>2</sub>)<sub>2</sub></b>                   | -3111059 | -3110530 | -3110489 | -3110600 | 0.372 |
| <i>meta</i>  | <b>T<sub>7</sub>(Ph)<sub>6</sub>(C<sub>3</sub>H<sub>6</sub>NH<sub>2</sub>)(OH)<sub>3</sub></b>               | -2821304 | -2820827 | -2820790 | -2820891 | 0.339 |
|              | <b>[T<sub>7</sub>(Ph)<sub>6</sub>(C<sub>3</sub>H<sub>6</sub>NH<sub>2</sub>)(OH)<sub>3</sub>]<sub>2</sub></b> | -5642662 | -5641706 | -5641633 | -5641812 | 0.599 |
|              | <b>T<sub>8</sub>(Ph)<sub>6</sub>(C<sub>3</sub>H<sub>6</sub>NH<sub>2</sub>)<sub>2</sub></b>                   | -3111062 | -3110532 | -3110492 | -3110599 | 0.358 |
| <i>para</i>  | <b>T<sub>7</sub>(Ph)<sub>6</sub>(C<sub>3</sub>H<sub>6</sub>NH<sub>2</sub>)(OH)<sub>3</sub></b>               | -2821305 | -2820828 | -2820791 | -2820891 | 0.336 |
|              | <b>[T<sub>7</sub>(Ph)<sub>6</sub>(C<sub>3</sub>H<sub>6</sub>NH<sub>2</sub>)(OH)<sub>3</sub>]<sub>2</sub></b> | -5642655 | -5641700 | -5641627 | -5641808 | 0.608 |
|              | <b>T<sub>8</sub>(Ph)<sub>6</sub>(C<sub>3</sub>H<sub>6</sub>NH<sub>2</sub>)<sub>2</sub></b>                   | -3111060 | -3110531 | -3110491 | -3110599 | 0.363 |
|              | <b>T<sub>8</sub>(Ph)<sub>7</sub>(C<sub>2</sub>H<sub>3</sub>)</b>                                             | -3087132 | -3086660 | -3086623 | -3086726 | 0.348 |
| <i>ortho</i> | <b>T<sub>7</sub>(Ph)<sub>6</sub>(C<sub>2</sub>H<sub>3</sub>)(OH)<sub>3</sub></b>                             | -2761127 | -2760694 | -2760660 | -2760756 | 0.323 |
|              | <b>[T<sub>7</sub>(Ph)<sub>6</sub>(C<sub>2</sub>H<sub>3</sub>)(OH)<sub>3</sub>]<sub>2</sub></b>               | -5522304 | -5521437 | -5521368 | -5521535 | 0.563 |
|              | <b>T<sub>8</sub>(Ph)<sub>6</sub>(C<sub>2</sub>H<sub>3</sub>)<sub>2</sub></b>                                 | -2990705 | -2990263 | -2990227 | -2990327 | 0.333 |
| <i>meta</i>  | <b>T<sub>7</sub>(Ph)<sub>6</sub>(C<sub>2</sub>H<sub>3</sub>)(OH)<sub>3</sub></b>                             | -2761127 | -2760694 | -2760659 | -2760755 | 0.321 |
|              | <b>[T<sub>7</sub>(Ph)<sub>6</sub>(C<sub>2</sub>H<sub>3</sub>)(OH)<sub>3</sub>]<sub>2</sub></b>               | -5522300 | -5521433 | -5521364 | -5521538 | 0.583 |
|              | <b>T<sub>8</sub>(Ph)<sub>6</sub>(C<sub>2</sub>H<sub>3</sub>)<sub>2</sub></b>                                 | -2990705 | -2990263 | -2990227 | -2990327 | 0.335 |
| <i>para</i>  | <b>T<sub>7</sub>(Ph)<sub>6</sub>(C<sub>2</sub>H<sub>3</sub>)(OH)<sub>3</sub></b>                             | -2761127 | -2760694 | -2760660 | -2760754 | 0.317 |
|              | <b>[T<sub>7</sub>(Ph)<sub>6</sub>(C<sub>2</sub>H<sub>3</sub>)(OH)<sub>3</sub>]<sub>2</sub></b>               | -5522300 | -5521433 | -5521363 | -5521534 | 0.573 |
|              | <b>T<sub>8</sub>(Ph)<sub>6</sub>(C<sub>2</sub>H<sub>3</sub>)<sub>2</sub></b>                                 | -2990705 | -2990263 | -2990227 | -2990327 | 0.336 |

<sup>a</sup> data are given in kcal/mol
